# Supplementary material
Source: publisher figshare collection journal article supplement (https://frontiersin.figshare.com/ndownloader/files/24758351)
Supplement: Supplementary file [file 24758351]

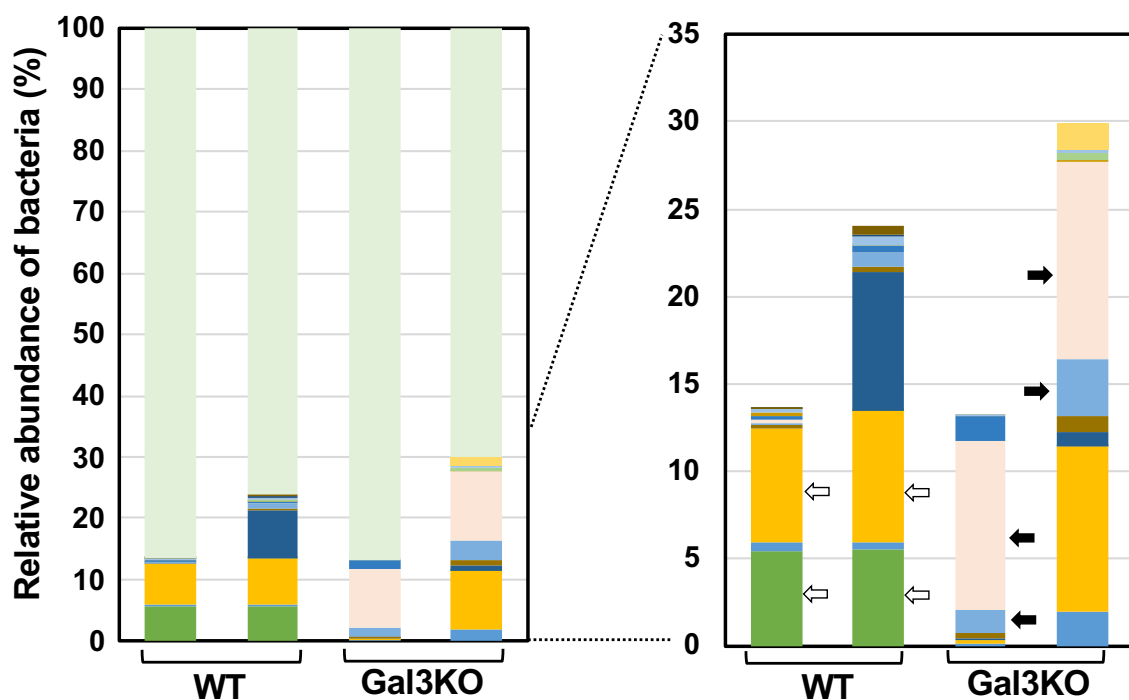

| Phylum          | Class               | Order              | Family              | Gram |   |
|-----------------|---------------------|--------------------|---------------------|------|---|
| Firmicutes      | Bacilli             | Lactobacillales    | Lactobacillaceae    | +    | ← |
| Verrucomicrobia | Verrucomicrobiae    | Verrucomicrobiales | Verrucomicrobiaceae | -    |   |
| Proteobacteria  | Gammaproteobacteria | Pasteurellales     | Pasteurellaceae     | -    |   |
| Proteobacteria  | Gammaproteobacteria | Enterobacteriales  | Enterobacteriaceae  | -    |   |
| Proteobacteria  | Deltaproteobacteria | Desulfovibrionales | Desulfovibrionaceae | -    |   |
| Proteobacteria  | Betaproteobacteria  | Burkholderiales    | Alcaligenaceae      | -    |   |
| Firmicutes      | Erysipelotrichi     | Erysipelotrichales | Erysipelotrichaceae | +    |   |
| Firmicutes      | Clostridia          | Clostridiales      | Lachnospiraceae     | +    |   |
| Firmicutes      | Clostridia          | Clostridiales      | Clostridiaceae      | +    |   |
| Firmicutes      | Clostridia          | Clostridiales      | -                   | +    |   |
| Firmicutes      | Clostridia          | Clostridiales      | Other               | +    | ← |
| Firmicutes      | Bacilli             | Lactobacillales    | Streptococcaceae    | +    | ← |
| Firmicutes      | Bacilli             | Lactobacillales    | Leuconostocaceae    | +    |   |
| Firmicutes      | Bacilli             | Gemellales         | Gemellaceae         | +    |   |
| Firmicutes      | Bacilli             | Bacillales         | Staphylococcaceae   | +    |   |
| Cyanobacteria   | Chloroplast         | Streptophyta       | -                   | -    |   |
| Bacteroidetes   | Bacteroidia         | Bacteroidales      | S24-7               | -    | ← |
| Actinobacteria  | Coriobacteriia      | Coriobacteriales   | Coriobacteriaceae   | +    |   |
| Actinobacteria  | Actinobacteria      | Bifidobacteriales  | Bifidobacteriaceae  | +    | ← |

← (light green arrow) indicates the family *Lactobacillaceae*.

← (white) and ← (black) arrows indicate bacteria of high relative abundance in WT mice and Gal3KO mice, respectively. Gram, Gram staining.

### Supplemental Figure 1. Small intestinal microbiota in WT and Gal3KO mice

We harvested small intestinal contents from naïve wild type (WT) and Gal3 knockout (Gal3KO) mice (n=2 each). Bacterial DNA isolation and 16S rRNA-based microbiota analysis was performed. (Left) Inter individual variation of total microbiome of each mouse at the family level, which was mainly composed of the family *Lactobacillaceae* (light green). (Right) Other than the family *Lactobacillaceae*, the families *S24-7* (orange) and *Bifidobacteriaceae* (green) were high in WT mice; the *Clostridiales* order unknown family (light pink) and the family *Streptococcaceae* (light blue) were high in Gal3KO mice.

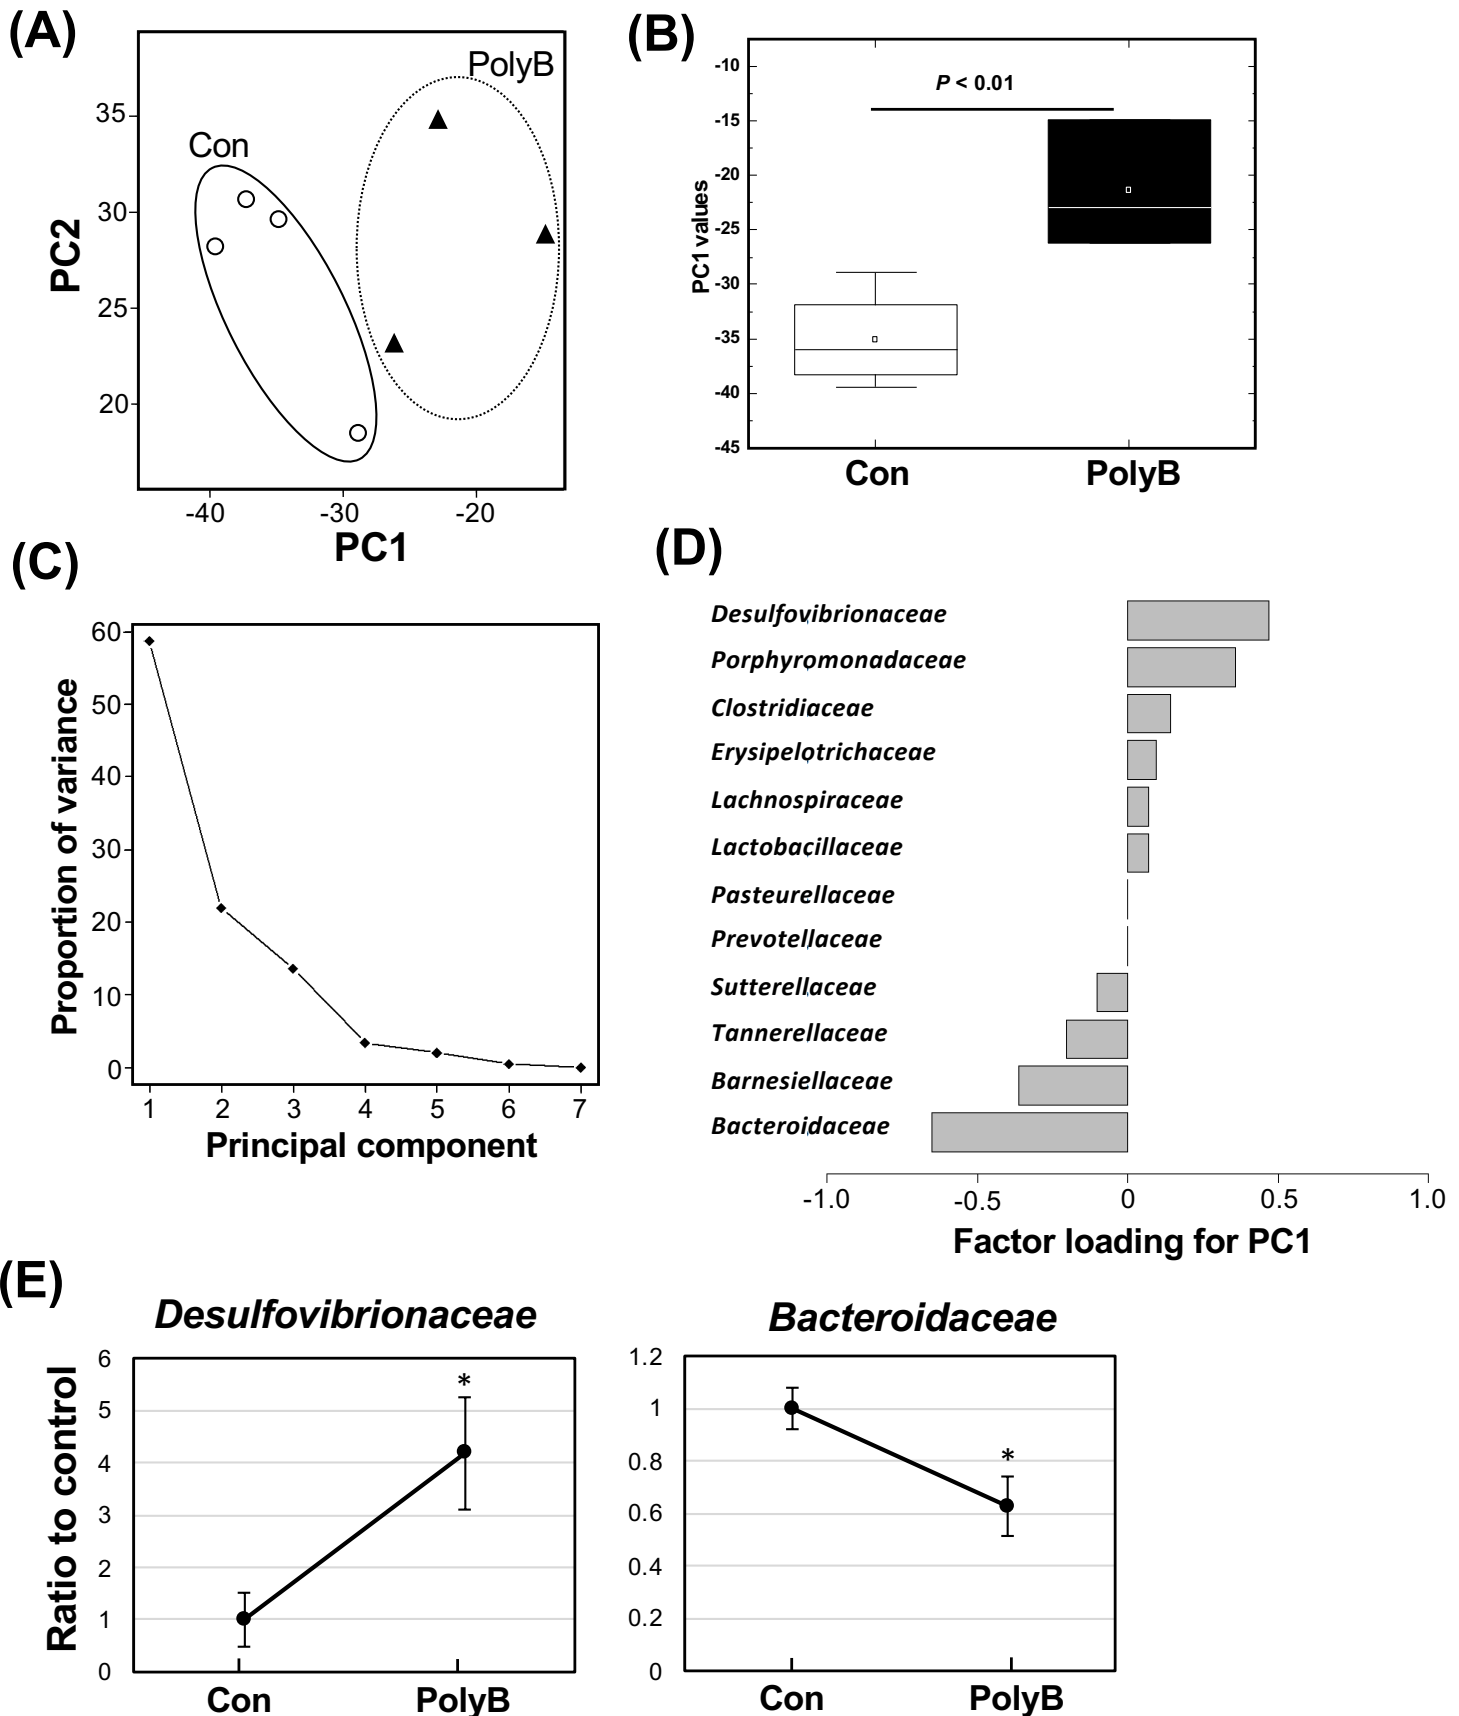

**Supplemental Figure 2. Small intestinal microbiota in control and polymyxin B treated WT mice.** (A) Principal component analysis (PCA) of microbiome data from control (Con, ○) and polymyxin B (PolyB)-treated mice (▲). (B) Two groups were separated by principal component (PC)1 values ( $P < 0.01$ ). We conducted PCA, using microbiome data at the family level. (C) Proportion of variance for PC1 and PC2 accounts for 58% and 22%, respectively. (D) Factor loading for PC1 showed that relative abundance of families *Desulfovibrionaceae* and *Bacteroidaceae* were positively and negatively correlated with PC1 values, respectively. (E) Relative changes of *Desulfovibrionaceae* and *Bacteroidaceae* by PolyB treatment. \* $P < 0.05$  Con versus PolyB treatment by the Student *t*-test.

### (A) Chao 1 Richness Index

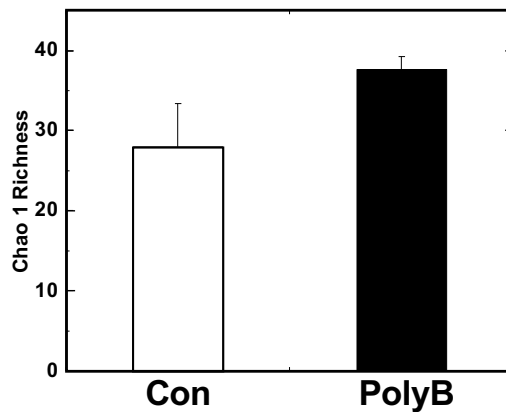

### (B) Pielou's Evenness Index

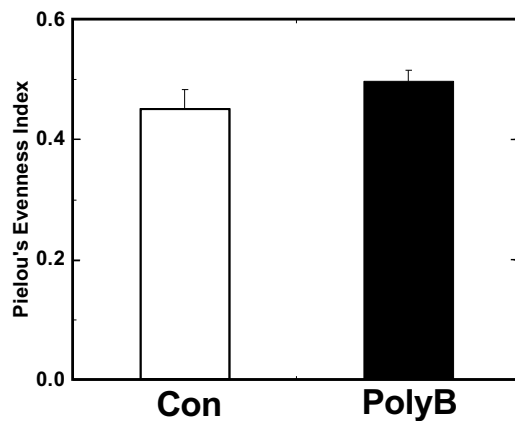

### (C) Shannon-Wiener Diversity Index

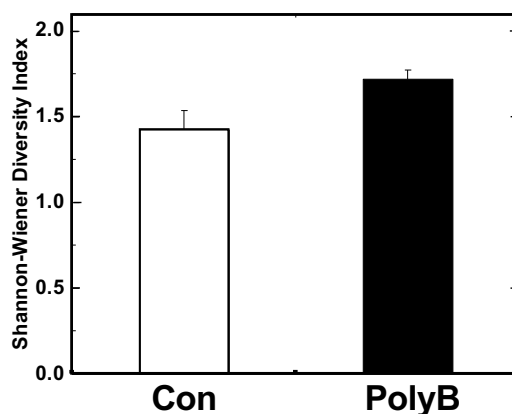

**Supplemental Figure 3. Analyses of bacterial alpha diversities of microbiome between control and polymyxin B-treated groups.** Using R, we compared the number of families, evenness and combination of them between the control (con) and the polymyxin B (PolyB)-treated groups by Chao 1 richness index (A), Pielou's evenness index (B), and Shannon-Wiener diversity index (C), respectively (1). We didn't find significant differences between the groups.

(1) Xia Y, Sun J, Chen D-G (2018). Statistical Analysis of Microbiome Data with R. London, UK: Springer Nature.
